# Supplementary material for: The Acute Neuromuscular Responses to Cluster Set Resistance Training: A Systematic Review and Meta-Analysis
Source: Springer Nature journal article supplement (doi:10.1007/s40279-019-01172-z), 2019-09-11

**The acute neuromuscular responses to cluster-set resistance training: A systematic review and meta-analysis**

**Short title: Acute responses to cluster-set training**

**Sports Medicine**

Christopher Latella<sup>1</sup>, Wei-Peng Teo<sup>2,3</sup>, Eric J. Drinkwater<sup>1,4</sup>, Kristina Kendall<sup>1</sup>, G. Gregory Haff<sup>1,5</sup>

<sup>1</sup> Centre for Exercise and Sports Science Research (CESSR), School of Health and Medical Sciences, Edith Cowan University, Joondalup, Australia

<sup>2</sup> Physical Education and Sports Science Academic Group, National Institute of Education, Nanyang Technological University, Singapore

<sup>3</sup> Institute for Physical Activity and Nutrition (IPAN), School of Exercise and Nutrition Sciences (SENS), Deakin University, Geelong, Australia

<sup>4</sup> Centre for Sport Research (CSR), School of Exercise and Nutrition Science, Deakin University, Geelong, Australia

<sup>5</sup> Directorate of Sport, Exercise and Physiotherapy, University of Salford, Greater Manchester, United Kingdom.

**Correspondence:**

Dr Christopher Latella

Email: c.latella@ecu.edu.au

Supplementary Figure 1)

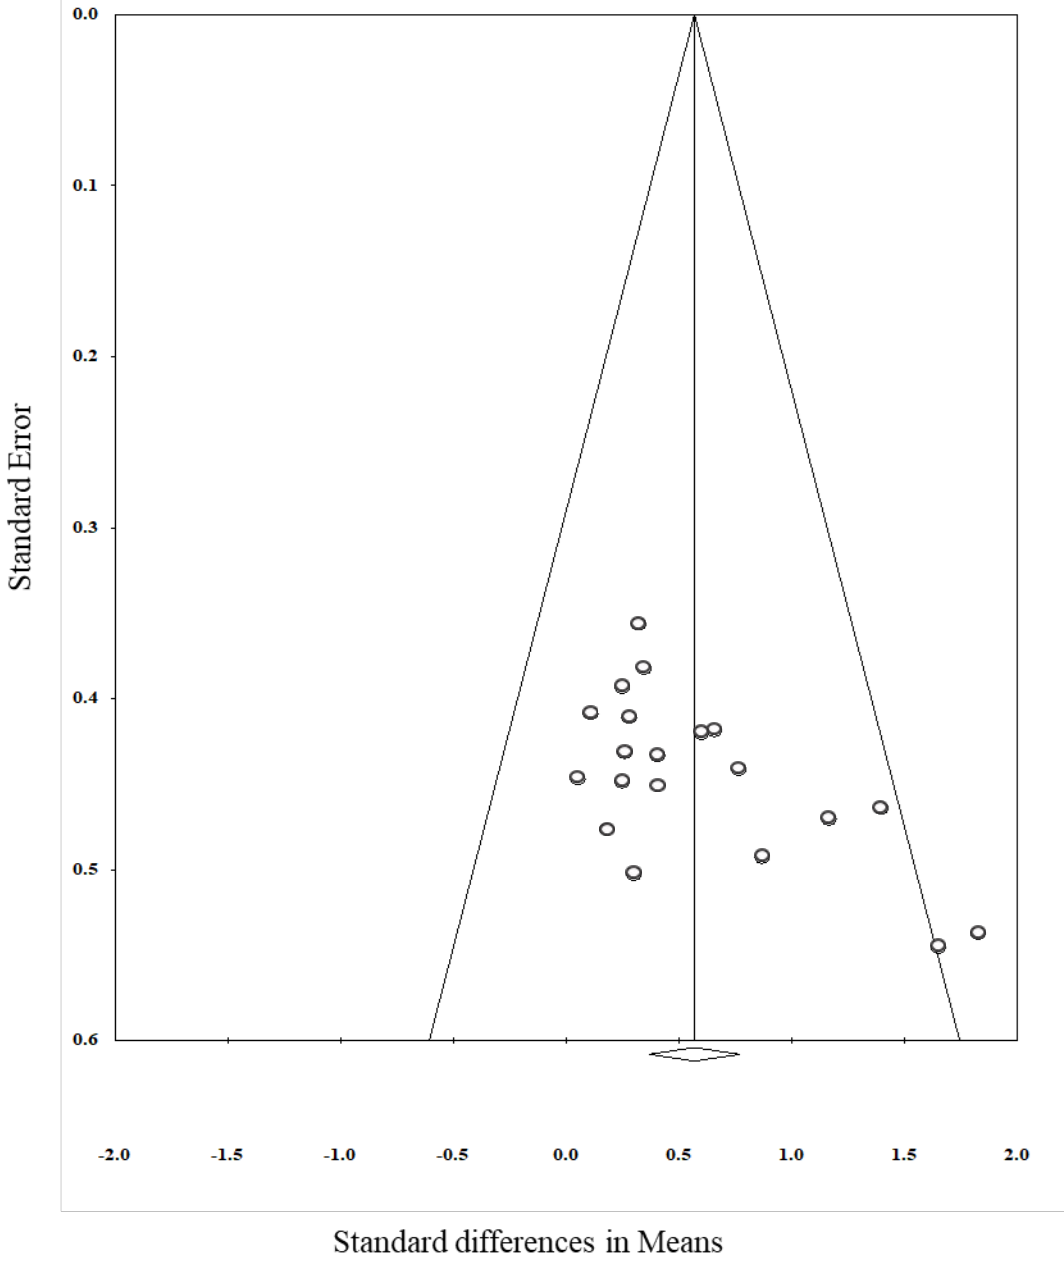

Supplement: MOESM1 [file 17161674]
