# Supplementary material for: The Acute Neuromuscular Responses to Cluster Set Resistance Training: A Systematic Review and Meta-Analysis
Source: Springer Nature journal article supplement (doi:10.1007/s40279-019-01172-z), 2019-09-11
Supplement: MOESM3 [file 17161674]

**The acute neuromuscular responses to cluster-set resistance training: A systematic review and meta-analysis**

**Short title: Acute responses to cluster-set training**

**Sports Medicine**

Christopher Latella<sup>1</sup>, Wei-Peng Teo<sup>2,3</sup>, Eric J. Drinkwater<sup>1,4</sup>, Kristina Kendall<sup>1</sup>, G. Gregory Haff<sup>1,5</sup>

<sup>1</sup> Centre for Exercise and Sports Science Research (CESSR), School of Health and Medical Sciences, Edith Cowan University, Joondalup, Australia

<sup>2</sup> Physical Education and Sports Science Academic Group, National Institute of Education, Nanyang Technological University, Singapore

<sup>3</sup> Institute for Physical Activity and Nutrition (IPAN), School of Exercise and Nutrition Sciences (SENS), Deakin University, Geelong, Australia

<sup>4</sup> Centre for Sport Research (CSR), School of Exercise and Nutrition Science, Deakin University, Geelong, Australia

<sup>5</sup> Directorate of Sport, Exercise and Physiotherapy, University of Salford, Greater Manchester, United Kingdom.

**Correspondence:**

Dr Christopher Latella

Email: c.latella@ecu.edu.au

Supplementary Table 2.

| Risk of bias assessment criteria |                     |                        |                                     |                     |                         |                             |                      |
|----------------------------------|---------------------|------------------------|-------------------------------------|---------------------|-------------------------|-----------------------------|----------------------|
|                                  | Sequence generation | Allocation concealment | Blinding of participants, personnel | Blinding of outcome | Incomplete outcome data | Selective outcome reporting | Other source of bias |
| Boullosa et al. [41]             | Low                 | Unclear                | High                                | High                | Low                     | Low                         | Low                  |
| Garcia-Ramos et al. [42]         | High                | Unclear                | High                                | High                | Low                     | Low                         | Low                  |
| Garcia-Ramos et al. [57]         | Low                 | Unclear                | High                                | High                | Low                     | Low                         | Low                  |
| Garcia-Ramos et al. [58]         | Low                 | Unclear                | High                                | High                | Low                     | Low                         | Low                  |
| Girman et al. [44]               | Low                 | Unclear                | High                                | High                | Low                     | Low                         | Low                  |
| Haff et al. [19]                 | Low                 | Unclear                | High                                | High                | Low                     | Low                         | Low                  |
| Hardee et al. [21]               | Low                 | Unclear                | High                                | High                | Low                     | Low                         | Low                  |
| Iglesias-Soler et al. [43]       | High                | Unclear                | High                                | High                | Low                     | Low                         | Low                  |
| Joy et al. [24]                  | Low                 | Unclear                | High                                | High                | Low                     | Low                         | Low                  |
| Marshall et al. [53]             | Low                 | Unclear                | High                                | High                | Low                     | Low                         | Low                  |
| Mayo et al. [56]                 | High                | Unclear                | High                                | High                | Low                     | Low                         | Low                  |
| Moir et al. [45]                 | High                | Unclear                | High                                | High                | Low                     | Low                         | Low                  |
| Nickerson et al. [52]            | Low                 | Unclear                | High                                | High                | Low                     | Low                         | Low                  |
| Nickerson et al. [59]            | Low                 | Unclear                | High                                | High                | Low                     | Low                         | Low                  |
| Oliver et al. [23]               | Low                 | Unclear                | High                                | High                | Low                     | High                        | Low                  |
| Oliver et al. [46]               | Low                 | Unclear                | High                                | High                | Low                     | High                        | Low                  |
| Oliver et al. [47]               | Low                 | Unclear                | High                                | High                | Low                     | High                        | Low                  |
| Rio-Rodriguez et al. [54]        | High                | Unclear                | High                                | High                | Low                     | Low                         | Low                  |
| Tufano et al. [25]               | Low                 | Unclear                | High                                | High                | Low                     | Unclear                     | Low                  |
| Tufano et al. [26]               | Low                 | Unclear                | High                                | High                | Low                     | Low                         | Low                  |
| Mora-Custodio et al. [50]        | Low                 | Unclear                | High                                | High                | Low                     | High                        | Low                  |
| Inglesias-Soler et al. [55]      | High                | Unclear                | High                                | High                | Low                     | Low                         | Low                  |
| Lawton et al. [22]               | Low                 | Unclear                | High                                | High                | Low                     | High                        | Low                  |
| Koefoed et al. [51]              | High                | Unclear                | High                                | High                | Low                     | Low                         | Low                  |
| Wagle et al. [49]                | Low                 | Unclear                | High                                | High                | Low                     | Low                         | Low                  |
| <b>Low risk</b>                  | <b>18</b>           | <b>0</b>               | <b>0</b>                            | <b>0</b>            | <b>25</b>               | <b>19</b>                   | <b>25</b>            |
| <b>High risk</b>                 | <b>7</b>            | <b>0</b>               | <b>25</b>                           | <b>25</b>           | <b>0</b>                | <b>5</b>                    | <b>0</b>             |
| <b>Unclear</b>                   | <b>0</b>            | <b>25</b>              | <b>0</b>                            | <b>0</b>            | <b>0</b>                | <b>1</b>                    | <b>0</b>             |
